# Supplementary material for: 25-Hydroxyvitamin D3 Levels, BsmI Polymorphism and Insulin Resistance in Brazilian Amazonian Children
Source: PubMed Central journal article supplement (PMC4490459; doi:10.3390/ijms160612531), 2015-06-03
Supplement: ijms-16-12531-s001.pdf [file ijms-16-12531-s001.pdf]

## Supplementary Information

**Table S1.** Factors associated with vitamin D deficiency (<50 nmol/L) in urban Amazonian children under 10 years old, Acrelândia, Brazil, 2007.

| Variables                            | Crude            |            |        | Adjusted *       |            |        |
|--------------------------------------|------------------|------------|--------|------------------|------------|--------|
|                                      | PR               | 95%, (CI)  | P      | PR               | 95%, (CI)  | P      |
| Socioeconomic status                 |                  |            |        |                  |            |        |
| Wealth concentration (quartiles)     |                  |            |        |                  |            |        |
| 1st                                  | <i>Reference</i> |            |        | <i>Reference</i> |            |        |
| 2nd                                  | 1.82             | 1.06, 3.15 | 0.030  | 1.85             | 1.07, 3.20 | 0.027  |
| 3rd                                  | 1.65             | 0.95, 2.86 | 0.070  | 1.71             | 0.98, 2.95 | 0.054  |
| 4th                                  | 1.00             | 0.53, 1.87 | 0.989  | 1.14             | 0.60, 2.19 | 0.679  |
| Maternal schooling (years)           |                  |            |        |                  |            |        |
| <9                                   | <i>Reference</i> |            |        | <i>Reference</i> |            |        |
| ≥9                                   | 0.67             | 0.43, 1.05 | 0.087  | 0.71             | 0.44, 1.14 | 0.167  |
| Child's characteristics              |                  |            |        |                  |            |        |
| Low birth weight (<2500 g)           | 1.88             | 1.01, 3.51 | 0.046  | 1.92             | 1.05, 3.51 | 0.033  |
| Biochemical indicators               |                  |            |        |                  |            |        |
| Vitamin E insufficiency (<11 μmol/L) | 3.03             | 2.00, 4.57 | <0.001 | 2.63             | 1.76, 3.93 | <0.001 |
| Serum folate (median, nmol/L)        |                  |            |        |                  |            |        |
| <23.6                                | <i>Reference</i> |            |        | <i>Reference</i> |            |        |
| ≥23.6                                | 0.66             | 0.45, 0.98 | 0.042  | 0.70             | 0.48, 1.03 | 0.076  |

PR, Prevalence Ratio; Models were adjusted for sex, age and race/ethnicity; \* Adjusted for other variables in the same or higher levels following the hierarchical conceptual framework.
